# Supplementary material for: The Evolution of Narrativity in Abstracts of the Biomedical Literature between 1989 and 2022
Source: MDPI journal article supplement (doi:10.3390/publications11020026), 2023-04-28
Supplement: s1 [file s1]

Archive with 1 entries (1 files):
- publications-2145956-SI.pdf
