# Supplementary material for: The Evolution of Narrativity in Abstracts of the Biomedical Literature between 1989 and 2022
Source: MDPI journal article supplement (doi:10.3390/publications11020026), 2023-04-28
Supplement: s1 [file s1 › publications-2145956-SI.pdf]

## **Supplementary Materials S1**

### **Text S1**

Sphingolipids are biologically active lipids that play important roles in various cellular processes and the sphingomyelin metabolites ceramide, sphingosine and sphingosine-1-phosphate can act as signalling molecules in most cell types. With the recent development of the immunosuppressant drug FTY720 (Fingolimod) which after phosphorylation in vivo acts as a sphingosine-1-phosphate receptor agonist, research on the role of sphingolipids in the immune and other organ systems was triggered enormously. Since it was reported that FTY720 induced a modest, but significant transient decrease in heart rate in animals and humans, the question was raised which pharmacological properties of drugs targeting sphingolipid signalling will affect cardiovascular function in vivo. The answer to this question will most likely also indicate what type of drug could be used to treat cardiovascular disease. The latter is becoming increasingly important because of the increasing population carrying characteristics of the metabolic syndrome. This syndrome is, amongst others, characterized by obesity, hypertension, atherosclerosis and diabetes. As such, individuals with this syndrome are at increased risk of heart disease. Now numerous studies have investigated sphingolipid effects in the cardiovascular system, can we speculate whether certain sphingolipids under specific conditions are good, bad or maybe both? In this review we will give a brief overview of the pathophysiological role of sphingolipids in cardiovascular disease. In addition, we will try to answer how drugs that target sphingolipid signalling will potentially influence cardiovascular function and whether these drugs would be useful to treat cardiovascular disease.

### **Text S2**

A possible approach to control of bovine lymphoproliferative disease caused by bovine leukaemia virus (BLV) may be the development of an "antiviral information immunity" based on the effect of anti-sense RNA (asRNA). A numbers of constructs were obtained, under control of various promotors (herpesvirus thymidine kinase, T-antigen SV40 promoter), carrying as DNA against gene X, the expression product of which is a transactivator of viral transcription from the BLV LTR promotor. As a model system for the analysis of antiviral activity of constructs developed, cloned continuous cell lines of BLV-producing FLK cells were used. The level of BLV expression in cells transfected with the constructs was determined by various parameters. Differences were detected in different clones obtained from non-transfected cells, as well as variation between transfected clones, as measured by reverse transcriptase, competitive radio-immunoassay for BLV p24, the viral particle count on agar membrane, and the tumorigenicity for nude mice. The differences in inhibition of expression of BLV genes and their products may be explained in terms of the site of integration of asDNA and the number of integrated copies.

## **Supplementary Materials S2**

Supplementary Materials 2 contains the results of the statistical analysis for the three parameters of narrativity in each corpus by decade. A two way ANOVA assay was performed on the parameter value, considering the decade of publication - C(decades) - and the abstract segment - C(segment) - as independent variables and their interaction C(decades): C(segment).

Their results are reported in the following tables A). sum\_sq= Sum of squares; df= degrees of freedom; F= F ratio; p= p value. Dunn post tests were performed on each segment by decade and their pairwise results are contained in tables B.

## Primary studies

### Staging

A)

|                              | sum_sq       | df        | F           | p        |
|------------------------------|--------------|-----------|-------------|----------|
| <b>C(decades)</b>            | 3.341831e+03 | 4.0       | 0.573256    | 0.682039 |
| <b>C(segment)</b>            | 2.940276e+07 | 4.0       | 5043.738245 | 0.000000 |
| <b>C(decades):C(segment)</b> | 2.645592e+06 | 16.0      | 113.455976  | 0.000000 |
| <b>Residual</b>              | 4.349884e+09 | 2984710.0 | NaN         | NaN      |

B)

#### Segment 1

|       | 2000s        | 2010s        | 2020s        | 80s          | 90s          |
|-------|--------------|--------------|--------------|--------------|--------------|
| 2000s | 1.000000e+00 |              |              |              |              |
| 2010s | 3.379383e-09 | 1.000000e+00 |              |              |              |
| 2020s | 4.445644e-05 | 5.396295e-01 | 1.000000e+00 |              |              |
| 80s   | 3.571508e-31 | 2.228524e-49 | 4.925385e-35 | 1.000000e+00 |              |
| 90s   | 3.643519e-14 | 2.214087e-41 | 9.137304e-18 | 1.134026e-13 | 1.000000e+00 |

#### Segment 2

|       | 2000s        | 2010s        | 2020s        | 80s      | 90s          |
|-------|--------------|--------------|--------------|----------|--------------|
| 2000s | 1.000000e+00 |              |              |          |              |
| 2010s | 1.146452e-19 | 1.000000e+00 |              |          |              |
| 2020s | 1.077163e-18 | 5.890550e-04 | 1.000000e+00 |          |              |
| 80s   | 8.959525e-03 | 2.693468e-02 | 2.174483e-05 | 1.000000 |              |
| 90s   | 7.801603e-02 | 1.616126e-26 | 1.329444e-22 | 0.000450 | 1.000000e+00 |

#### Segment 3

|       | 2000s        | 2010s        | 2020s        | 80s          | 90s          |
|-------|--------------|--------------|--------------|--------------|--------------|
| 2000s | 1.000000e+00 |              |              |              |              |
| 2010s | 5.565663e-14 | 1.000000e+00 |              |              |              |
| 2020s | 2.850303e-07 | 4.643897e-01 | 1.000000e+00 |              |              |
| 80s   | 1.113970e-17 | 2.424130e-36 | 1.394234e-26 | 1.000000e+00 |              |
| 90s   | 5.895582e-22 | 7.551856e-66 | 1.943407e-27 | 1.134621e-03 | 1.000000e+00 |

#### Segment 4

|       | 2000s        | 2010s        | 2020s        | 80s          | 90s          |
|-------|--------------|--------------|--------------|--------------|--------------|
| 2000s | 1.000000e+00 |              |              |              |              |
| 2010s | 4.094851e-12 | 1.000000e+00 |              |              |              |
| 2020s | 6.812183e-11 | 1.503142e-02 | 1.000000e+00 |              |              |
| 80s   | 1.568934e-06 | 1.535797e-17 | 7.409355e-18 | 1.000000e+00 |              |
| 90s   | 1.966117e-16 | 6.454798e-52 | 5.043501e-30 | 7.734510e-01 | 1.000000e+00 |

#### Segment 5

|       | 2000s        | 2010s        | 2020s    | 80s          | 90s          |
|-------|--------------|--------------|----------|--------------|--------------|
| 2000s | 1.000000e+00 |              |          |              |              |
| 2010s | 5.988519e-01 | 1.000000e+00 |          |              |              |
| 2020s | 5.988519e-01 | 4.860467e-01 | 1.000000 |              |              |
| 80s   | 2.213114e-06 | 6.168072e-07 | 0.000745 | 1.000000e+00 |              |
| 90s   | 3.698183e-09 | 1.573153e-10 | 0.002815 | 1.794960e-01 | 1.000000e+00 |

## Plot progression

A)

|                              | sum_sq       | df        | F            | p        |
|------------------------------|--------------|-----------|--------------|----------|
| <b>C(decades)</b>            | 1.643277e+04 | 4.0       | 2.834756     | 0.023007 |
| <b>C(segment)</b>            | 9.597566e+07 | 4.0       | 16556.399146 | 0.000000 |
| <b>C(decades):C(segment)</b> | 1.856689e+07 | 16.0      | 800.726151   | 0.000000 |
| <b>Residual</b>              | 4.325510e+09 | 2984710.0 | NaN          | NaN      |

B)

Segment 1

|       | 2000s         | 2010s        | 2020s        | 80s          | 90s |
|-------|---------------|--------------|--------------|--------------|-----|
| 2000s | 1.000000e+00  |              |              |              |     |
| 2010s | 5.047295e-297 | 1.000000e+00 |              |              |     |
| 2020s | 9.860913e-242 | 4.110904e-31 | 1.000000e+00 |              |     |
| 80s   | 6.444574e-183 | 0.000000e+00 | 0.000000e+00 | 1.000000e+00 |     |
| 90s   | 7.587486e-192 | 0.000000e+00 | 0.000000e+00 | 2.816054e-36 |     |

|       | 90s          |
|-------|--------------|
| 2000s |              |
| 2010s |              |
| 2020s |              |
| 80s   |              |
| 90s   | 1.000000e+00 |

Segment 2

|       | 2000s    | 2010s        | 2020s        | 80s      | 90s          |
|-------|----------|--------------|--------------|----------|--------------|
| 2000s | 1.000000 |              |              |          |              |
| 2010s | 0.000244 | 1.000000e+00 |              |          |              |
| 2020s | 0.004233 | 4.939907e-01 | 1.000000e+00 |          |              |
| 80s   | 0.355114 | 3.948432e-03 | 4.232725e-03 | 1.000000 |              |
| 90s   | 0.000010 | 1.141603e-16 | 4.449724e-08 | 0.149243 | 1.000000e+00 |

Segment 3

|       | 2000s        | 2010s        | 2020s        | 80s          | 90s          |
|-------|--------------|--------------|--------------|--------------|--------------|
| 2000s | 1.000000e+00 |              |              |              |              |
| 2010s | 9.035700e-11 | 1.000000e+00 |              |              |              |
| 2020s | 7.381137e-11 | 5.819412e-03 | 1.000000e+00 |              |              |
| 80s   | 3.306047e-14 | 1.735356e-28 | 8.763570e-28 | 1.000000e+00 |              |
| 90s   | 1.259654e-09 | 1.527892e-35 | 4.136993e-24 | 1.832165e-05 | 1.000000e+00 |

Segment 4

|       | 2000s        | 2010s         | 2020s        | 80s          | 90s          |
|-------|--------------|---------------|--------------|--------------|--------------|
| 2000s | 1.000000e+00 |               |              |              |              |
| 2010s | 2.551410e-64 | 1.000000e+00  |              |              |              |
| 2020s | 1.033000e-42 | 1.611327e-04  | 1.000000e+00 |              |              |
| 80s   | 4.817427e-31 | 3.092887e-95  | 5.122814e-84 | 1.000000e+00 |              |
| 90s   | 5.633688e-31 | 2.472127e-177 | 6.465907e-94 | 1.809832e-07 | 1.000000e+00 |

Segment 5

|       | 2000s        | 2010s         | 2020s         | 80s          | 90s          |
|-------|--------------|---------------|---------------|--------------|--------------|
| 2000s | 1.000000e+00 |               |               |              |              |
| 2010s | 1.100791e-76 | 1.000000e+00  |               |              |              |
| 2020s | 6.051525e-56 | 1.196152e-06  | 1.000000e+00  |              |              |
| 80s   | 7.671039e-14 | 1.639781e-68  | 1.986126e-69  | 1.000000e+00 |              |
| 90s   | 5.148503e-47 | 5.897317e-237 | 2.361065e-130 | 6.831976e-01 | 1.000000e+00 |

Cognitive tension

A)

|                              | sum_sq       | df   | F            | p            |
|------------------------------|--------------|------|--------------|--------------|
| <b>C(decades)</b>            | 2.454175e+05 | 4.0  | 39.251806    | 6.420598e-33 |
| <b>C(segment)</b>            | 1.287666e+08 | 4.0  | 20594.787756 | 0.000000e+00 |
| <b>C(decades):C(segment)</b> | 5.420845e+06 | 16.0 | 216.751000   | 0.000000e+00 |

|                 | sum_sq       | df        | F   | p   |
|-----------------|--------------|-----------|-----|-----|
| <b>Residual</b> | 4.665391e+09 | 2984710.0 | NaN | NaN |

B)

| Segment 1 |              |               |              |              |              |
|-----------|--------------|---------------|--------------|--------------|--------------|
|           | 2000s        | 2010s         | 2020s        | 80s          | 90s          |
| 2000s     | 1.000000e+00 |               |              |              |              |
| 2010s     | 2.133243e-18 | 1.000000e+00  |              |              |              |
| 2020s     | 9.569082e-10 | 3.318501e-01  | 1.000000e+00 |              |              |
| 80s       | 4.290736e-73 | 2.125878e-115 | 5.514180e-81 | 1.000000e+00 |              |
| 90s       | 3.535659e-18 | 4.374692e-68  | 1.614744e-29 | 3.668346e-40 | 1.000000e+00 |

| Segment 2 |              |               |               |              |              |
|-----------|--------------|---------------|---------------|--------------|--------------|
|           | 2000s        | 2010s         | 2020s         | 80s          | 90s          |
| 2000s     | 1.000000e+00 |               |               |              |              |
| 2010s     | 4.905126e-37 | 1.000000e+00  |               |              |              |
| 2020s     | 2.474849e-41 | 1.605932e-09  | 1.000000e+00  |              |              |
| 80s       | 3.895537e-17 | 1.364150e-52  | 1.964762e-62  | 1.000000e+00 |              |
| 90s       | 1.013433e-38 | 1.845817e-145 | 9.870384e-100 | 2.022125e-01 | 1.000000e+00 |

| Segment 3 |              |              |              |          |              |
|-----------|--------------|--------------|--------------|----------|--------------|
|           | 2000s        | 2010s        | 2020s        | 80s      | 90s          |
| 2000s     | 1.000000e+00 |              |              |          |              |
| 2010s     | 2.187250e-06 | 1.000000e+00 |              |          |              |
| 2020s     | 2.785632e-13 | 8.815355e-06 | 1.000000e+00 |          |              |
| 80s       | 1.427435e-01 | 2.626186e-01 | 3.339714e-05 | 1.000000 |              |
| 90s       | 8.287381e-04 | 3.953563e-16 | 2.265583e-20 | 0.000856 | 1.000000e+00 |

| Segment 4 |              |               |              |              |              |
|-----------|--------------|---------------|--------------|--------------|--------------|
|           | 2000s        | 2010s         | 2020s        | 80s          | 90s          |
| 2000s     | 1.000000e+00 |               |              |              |              |
| 2010s     | 1.066441e-22 | 1.000000e+00  |              |              |              |
| 2020s     | 1.844771e-21 | 1.656723e-04  | 1.000000e+00 |              |              |
| 80s       | 2.896061e-57 | 2.680379e-100 | 1.183807e-87 | 1.000000e+00 |              |
| 90s       | 1.030122e-45 | 2.925488e-127 | 3.778568e-72 | 3.854380e-16 | 1.000000e+00 |

| Segment 5 |              |              |              |          |          |
|-----------|--------------|--------------|--------------|----------|----------|
|           | 2000s        | 2010s        | 2020s        | 80s      | 90s      |
| 2000s     | 1.000000e+00 |              |              |          |          |
| 2010s     | 8.154084e-09 | 1.000000e+00 |              |          |          |
| 2020s     | 1.778600e-07 | 8.042415e-02 | 1.000000e+00 |          |          |
| 80s       | 3.963599e-06 | 1.781152e-01 | 8.259365e-01 | 1.000000 |          |
| 90s       | 3.641543e-01 | 1.286481e-06 | 2.380630e-06 | 0.000044 | 1.000000 |

## Reviews

A)

Staging

|                              | sum_sq       | df        | F           | p             |
|------------------------------|--------------|-----------|-------------|---------------|
| <b>C(decades)</b>            | 4.292025e+03 | 4.0       | 0.731666    | 5.701719e-01  |
| <b>C(segment)</b>            | 1.623547e+07 | 4.0       | 2767.679253 | 0.000000e+00  |
| <b>C(decades):C(segment)</b> | 1.505440e+06 | 16.0      | 64.158527   | 2.554705e-208 |
| <b>Residual</b>              | 3.984296e+09 | 2716830.0 | NaN         | NaN           |

B)

| Segment 1 |              |              |              |              |     |
|-----------|--------------|--------------|--------------|--------------|-----|
|           | 2000s        | 2010s        | 2020s        | 80s          | 90s |
| 2000s     | 1.000000e+00 |              |              |              |     |
| 2010s     | 1.613498e-04 | 1.000000e+00 |              |              |     |
| 2020s     | 5.527008e-08 | 1.183955e-03 | 1.000000e+00 |              |     |
| 80s       | 3.825345e-02 | 6.049761e-05 | 3.362066e-08 | 1.000000e+00 |     |

```
90s      3.185497e-05  2.203725e-15  2.101435e-15  8.174144e-01  1.000000e+00
```

#### Segment 2

```
      2000s      2010s      2020s      80s      90s
2000s  1.000000
2010s  0.614624  1.000000
2020s  0.282380  0.408383  1.000000
80s    0.282380  0.270748  0.194708  1.000000
90s    0.880278  0.677097  0.290243  0.282380  1.000000
```

#### Segment 3

```
      2000s      2010s      2020s      80s      90s
2000s  1.000000
2010s  0.000791  1.000000e+00
2020s  0.031389  9.086308e-01  1.000000
80s    0.024964  6.590664e-05  0.000749  1.000000
90s    0.000015  8.751287e-15  0.000002  0.908631  1.000000e+00
```

#### Segment 4

```
      2000s      2010s      2020s      80s      90s
2000s  1.000000
2010s  0.071595  1.000000
2020s  0.071595  0.501754  1.000000
80s    0.054388  0.004227  0.004227  1.000000
90s    0.730259  0.056545  0.060667  0.056545  1.000000
```

#### Segment 5

```
      2000s      2010s      2020s      80s      90s
2000s  1.000000e+00
2010s  2.456591e-15  1.000000e+00
2020s  3.289679e-23  1.581656e-07  1.000000e+00
80s    3.628433e-12  1.779000e-28  1.927656e-37  1.000000e+00
90s    6.042282e-18  1.772178e-60  4.647381e-52  2.554725e-02  1.000000e+00
```

## Plot progression

A)

|                              | sum_sq       | df        | F           | p             |
|------------------------------|--------------|-----------|-------------|---------------|
| <b>C(decades)</b>            | 2.334271e+03 | 4.0       | 0.396748    | 8.111280e-01  |
| <b>C(segment)</b>            | 3.489502e+07 | 4.0       | 5930.988014 | 0.000000e+00  |
| <b>C(decades):C(segment)</b> | 9.805250e+05 | 16.0      | 41.664127   | 1.689431e-131 |
| <b>Residual</b>              | 3.996123e+09 | 2716830.0 | NaN         | NaN           |

B)

#### Segment 1

```
      2000s      2010s      2020s      80s      90s
2000s  1.000000e+00
2010s  4.131156e-22  1.000000e+00
2020s  1.706877e-23  2.387764e-05  1.000000e+00
80s    9.577273e-04  5.470178e-17  4.969493e-23  1.000000e+00
90s    1.584021e-03  1.001154e-35  2.548294e-32  1.064991e-01  1.000000e+00
```

#### Segment 2

```
      2000s      2010s      2020s      80s      90s
2000s  1.000000
2010s  0.040856  1.000000
2020s  0.347530  0.641373  1.000000
80s    0.482441  0.090976  0.271641  1.000000
90s    0.347530  0.271641  0.674346  0.271641  1.000000
```

#### Segment 3

```
      2000s      2010s      2020s      80s      90s
2000s  1.000000
2010s  0.000582  1.000000
2020s  0.030213  0.932789  1.000000
80s    0.932789  0.051135  0.079923  1.000000
90s    0.882595  0.000232  0.017601  0.968724  1.000000
```

**Segment 4**

|       | 2000s    | 2010s    | 2020s    | 80s      | 90s      |
|-------|----------|----------|----------|----------|----------|
| 2000s | 1.000000 |          |          |          |          |
| 2010s | 0.958479 | 1.000000 |          |          |          |
| 2020s | 0.958479 | 0.958479 | 1.000000 |          |          |
| 80s   | 0.958479 | 0.958479 | 0.958479 | 1.000000 |          |
| 90s   | 0.958479 | 0.958479 | 0.958479 | 0.958479 | 1.000000 |

**Segment 5**

|       | 2000s    | 2010s        | 2020s        | 80s      | 90s          |
|-------|----------|--------------|--------------|----------|--------------|
| 2000s | 1.000000 |              |              |          |              |
| 2010s | 0.001132 | 1.000000e+00 |              |          |              |
| 2020s | 0.000003 | 5.172657e-03 | 1.000000e+00 |          |              |
| 80s   | 0.222392 | 3.256604e-03 | 1.452606e-05 | 1.000000 |              |
| 90s   | 0.000021 | 7.985997e-14 | 1.914663e-13 | 0.269694 | 1.000000e+00 |

**Cognitive tension****A)**

|                              | sum_sq       | df        | F           | p            |
|------------------------------|--------------|-----------|-------------|--------------|
| <b>C(decades)</b>            | 4.486894e+03 | 4.0       | 0.701033    | 5.911194e-01 |
| <b>C(segment)</b>            | 4.591984e+07 | 4.0       | 7174.527723 | 0.000000e+00 |
| <b>C(decades):C(segment)</b> | 5.503963e+05 | 16.0      | 21.498513   | 1.883054e-63 |
| <b>Residual</b>              | 4.347199e+09 | 2716830.0 | NaN         | NaN          |

**B)****Segment 1**

|       | 2000s    | 2010s        | 2020s        | 80s          | 90s          |
|-------|----------|--------------|--------------|--------------|--------------|
| 2000s | 1.000000 |              |              |              |              |
| 2010s | 0.000001 | 1.000000e+00 |              |              |              |
| 2020s | 0.000005 | 9.007194e-02 | 1.000000e+00 |              |              |
| 80s   | 0.002339 | 2.382247e-08 | 1.675361e-08 | 1.000000e+00 |              |
| 90s   | 0.052092 | 9.406408e-11 | 1.801514e-08 | 5.064251e-02 | 1.000000e+00 |

**Segment 2**

|       | 2000s    | 2010s        | 2020s    | 80s      | 90s          |
|-------|----------|--------------|----------|----------|--------------|
| 2000s | 1.000000 |              |          |          |              |
| 2010s | 0.146804 | 1.000000e+00 |          |          |              |
| 2020s | 0.866553 | 4.609690e-01 | 1.000000 |          |              |
| 80s   | 0.003234 | 1.491485e-04 | 0.010470 | 1.000000 |              |
| 90s   | 0.000149 | 7.981020e-08 | 0.010470 | 0.415606 | 1.000000e+00 |

**Segment 3**

|       | 2000s    | 2010s    | 2020s    | 80s      | 90s      |
|-------|----------|----------|----------|----------|----------|
| 2000s | 1.000000 |          |          |          |          |
| 2010s | 0.102323 | 1.000000 |          |          |          |
| 2020s | 0.002410 | 0.035461 | 1.000000 |          |          |
| 80s   | 0.023164 | 0.001996 | 0.000070 | 1.000000 |          |
| 90s   | 0.001736 | 0.000002 | 0.000001 | 0.580013 | 1.000000 |

**Segment 4**

|       | 2000s    | 2010s    | 2020s    | 80s      | 90s      |
|-------|----------|----------|----------|----------|----------|
| 2000s | 1.000000 |          |          |          |          |
| 2010s | 0.908581 | 1.000000 |          |          |          |
| 2020s | 0.009334 | 0.006669 | 1.000000 |          |          |
| 80s   | 0.940691 | 0.908581 | 0.108124 | 1.000000 |          |
| 90s   | 0.908581 | 0.940691 | 0.006669 | 0.908581 | 1.000000 |

**Segment 5**

|       | 2000s    | 2010s    | 2020s    | 80s      | 90s      |
|-------|----------|----------|----------|----------|----------|
| 2000s | 1.000000 |          |          |          |          |
| 2010s | 0.174738 | 1.000000 |          |          |          |
| 2020s | 0.008088 | 0.054882 | 1.000000 |          |          |
| 80s   | 0.915807 | 0.439832 | 0.054882 | 1.000000 |          |
| 90s   | 0.002833 | 0.054882 | 0.439832 | 0.065430 | 1.000000 |

# All articles

A)

## Staging

|                              | sum_sq       | df        | F           | p        |
|------------------------------|--------------|-----------|-------------|----------|
| <b>C(decades)</b>            | 1.830785e+03 | 5.0       | 0.250676    | 0.939655 |
| <b>C(segment)</b>            | 2.750224e+07 | 4.0       | 4707.100278 | 0.000000 |
| <b>C(decades):C(segment)</b> | 6.046791e+06 | 20.0      | 206.985708  | 0.000000 |
| <b>Residual</b>              | 5.720455e+09 | 3916300.0 | NaN         | NaN      |

B)

### Segment 1

|       | 2000s         | 2010s         | 2020s        | 70s          | \ |
|-------|---------------|---------------|--------------|--------------|---|
| 2000s | 1.000000e+00  |               |              |              |   |
| 2010s | 6.249862e-06  | 1.000000e+00  |              |              |   |
| 2020s | 1.924458e-02  | 7.676875e-01  | 1.000000e+00 |              |   |
| 70s   | 9.663527e-79  | 2.965230e-111 | 7.713410e-52 | 1.000000e+00 |   |
| 80s   | 3.282018e-108 | 1.327871e-156 | 9.138850e-57 | 4.050721e-01 |   |
| 90s   | 5.151939e-12  | 1.450205e-30  | 7.126509e-11 | 5.529785e-40 |   |
|       | 80s           | 90s           |              |              |   |
| 2000s |               |               |              |              |   |
| 2010s |               |               |              |              |   |
| 2020s |               |               |              |              |   |
| 70s   |               |               |              |              |   |
| 80s   | 1.000000e+00  |               |              |              |   |
| 90s   | 5.843196e-52  | 1.000000e+00  |              |              |   |

### Segment 2

|       | 2000s        | 2010s        | 2020s        | 70s          | 80s      | \ |
|-------|--------------|--------------|--------------|--------------|----------|---|
| 2000s | 1.000000e+00 |              |              |              |          |   |
| 2010s | 1.260011e-10 | 1.000000e+00 |              |              |          |   |
| 2020s | 1.260011e-10 | 9.087560e-03 | 1.000000e+00 |              |          |   |
| 70s   | 1.815574e-09 | 2.867559e-01 | 1.101935e-01 | 1.000000e+00 |          |   |
| 80s   | 2.010534e-04 | 1.891569e-02 | 6.757872e-05 | 4.552011e-03 | 1.000000 |   |
| 90s   | 4.178603e-01 | 3.249548e-12 | 1.337892e-11 | 8.011228e-11 | 0.000010 |   |
|       | 90s          |              |              |              |          |   |
| 2000s |              |              |              |              |          |   |
| 2010s |              |              |              |              |          |   |
| 2020s |              |              |              |              |          |   |
| 70s   |              |              |              |              |          |   |
| 80s   |              |              |              |              |          |   |
| 90s   | 1.000000e+00 |              |              |              |          |   |

### Segment 3

|       | 2000s        | 2010s         | 2020s        | 70s          | 80s          | \ |
|-------|--------------|---------------|--------------|--------------|--------------|---|
| 2000s | 1.000000e+00 |               |              |              |              |   |
| 2010s | 1.341920e-12 | 1.000000e+00  |              |              |              |   |
| 2020s | 1.373447e-06 | 5.457064e-01  | 1.000000e+00 | 1            |              |   |
| 70s   | 1.714938e-38 | 1.807572e-76  | 1.898564e-40 | 1.000000e+00 |              |   |
| 80s   | 1.324941e-54 | 2.683532e-112 | 2.066568e-46 | 7.337661e-01 | 1.000000e+00 |   |
| 90s   | 1.198916e-15 | 1.598197e-51  | 6.762048e-22 | 3.809101e-11 | 1.447922e-14 |   |
|       | 90s          |               |              |              |              |   |
| 2000s |              |               |              |              |              |   |
| 2010s |              |               |              |              |              |   |
| 2020s |              |               |              |              |              |   |
| 70s   |              |               |              |              |              |   |
| 80s   |              |               |              |              |              |   |
| 90s   | 1.000000e+00 |               |              |              |              |   |

### Segment 4

|       | 2000s        | 2010s        | 2020s        | 70s | 80s | \ |
|-------|--------------|--------------|--------------|-----|-----|---|
| 2000s | 1.000000e+00 |              |              |     |     |   |
| 2010s | 9.053551e-11 | 1.000000e+00 |              |     |     |   |
| 2020s | 3.506753e-09 | 3.652470e-02 | 1.000000e+00 |     |     |   |

|     |              |              |              |              |              |
|-----|--------------|--------------|--------------|--------------|--------------|
| 70s | 2.177623e-14 | 8.962615e-37 | 2.288033e-26 | 1.000000e+00 |              |
| 80s | 7.610270e-28 | 9.577791e-67 | 6.331960e-36 | 2.369152e-01 | 1.000000e+00 |
| 90s | 2.230637e-08 | 1.599097e-33 | 2.137807e-20 | 1.282367e-03 | 4.971611e-08 |

|       |              |
|-------|--------------|
|       | 90s          |
| 2000s |              |
| 2010s |              |
| 2020s |              |
| 70s   |              |
| 80s   |              |
| 90s   | 1.000000e+00 |

#### Segment 5

|       |              |              |              |              |              |
|-------|--------------|--------------|--------------|--------------|--------------|
|       | 2000s        | 2010s        | 2020s        | 70s          | 80s \        |
| 2000s | 1.000000e+00 |              |              |              |              |
| 2010s | 2.485614e-01 | 1.000000e+00 |              |              |              |
| 2020s | 1.592048e-01 | 4.337936e-01 | 1.000000e+00 |              |              |
| 70s   | 3.299839e-21 | 4.175904e-25 | 4.071893e-15 | 1.000000e+00 |              |
| 80s   | 2.548944e-19 | 2.597110e-24 | 3.659334e-12 | 3.786996e-02 | 1.000000e+00 |
| 90s   | 3.345467e-10 | 5.938994e-14 | 1.826347e-07 | 7.165271e-06 | 4.931950e-03 |

|       |              |
|-------|--------------|
|       | 90s          |
| 2000s |              |
| 2010s |              |
| 2020s |              |
| 70s   |              |
| 80s   |              |
| 90s   | 1.000000e+00 |

## Plot progression

A)

|                              | sum_sq       | df        | F            | p            |
|------------------------------|--------------|-----------|--------------|--------------|
| <b>C(decades)</b>            | 1.030515e+05 | 5.0       | 14.270214    | 5.364011e-14 |
| <b>C(segment)</b>            | 1.437553e+08 | 4.0       | 24883.423494 | 0.000000e+00 |
| <b>C(decades):C(segment)</b> | 3.238351e+07 | 20.0      | 1121.089352  | 0.000000e+00 |
| <b>Residual</b>              | 5.656263e+09 | 3916300.0 | NaN          | NaN          |

B)

#### Segment 1

|       |               |              |              |               |
|-------|---------------|--------------|--------------|---------------|
|       | 2000s         | 2010s        | 2020s        | 70s \         |
| 2000s | 1.000000e+00  |              |              |               |
| 2010s | 3.480473e-212 | 1.000000e+00 |              |               |
| 2020s | 3.848590e-163 | 3.769848e-19 | 1.000000e+00 |               |
| 70s   | 0.000000e+00  | 0.000000e+00 | 0.000000e+00 | 1.000000e+00  |
| 80s   | 0.000000e+00  | 0.000000e+00 | 0.000000e+00 | 3.535691e-06  |
| 90s   | 1.334644e-163 | 0.000000e+00 | 0.000000e+00 | 2.975342e-134 |

|       |               |              |
|-------|---------------|--------------|
|       | 80s           | 90s          |
| 2000s |               |              |
| 2010s |               |              |
| 2020s |               |              |
| 70s   |               |              |
| 80s   | 1.000000e+00  |              |
| 90s   | 1.030424e-132 | 1.000000e+00 |

#### Segment 2

|       |          |              |              |              |          |
|-------|----------|--------------|--------------|--------------|----------|
|       | 2000s    | 2010s        | 2020s        | 70s          | 80s \    |
| 2000s | 1.000000 |              |              |              |          |
| 2010s | 0.008070 | 1.000000e+00 |              |              |          |
| 2020s | 0.007783 | 2.749887e-01 | 1.000000e+00 |              |          |
| 70s   | 0.000087 | 5.077306e-02 | 7.253255e-01 | 1.000000e+00 |          |
| 80s   | 0.282859 | 3.694034e-04 | 1.115493e-03 | 3.491908e-06 | 1.000000 |
| 90s   | 0.000042 | 8.911383e-12 | 3.467974e-07 | 1.074483e-12 | 0.003749 |

|       |     |
|-------|-----|
|       | 90s |
| 2000s |     |
| 2010s |     |

2020s  
70s  
80s  
90s 1.000000e+00

#### Segment 3

|       | 2000s        | 2010s        | 2020s        | 70s          | 80s          | \ |
|-------|--------------|--------------|--------------|--------------|--------------|---|
| 2000s | 1.000000e+00 |              |              |              |              |   |
| 2010s | 1.540843e-12 | 1.000000e+00 |              |              |              |   |
| 2020s | 2.503242e-07 | 3.103984e-01 | 1.000000e+00 |              |              |   |
| 70s   | 3.363392e-49 | 1.897270e-91 | 9.586661e-50 | 1.000000e+00 |              |   |
| 80s   | 8.191378e-33 | 6.719727e-79 | 3.392346e-35 | 7.275742e-07 | 1.000000e+00 |   |
| 90s   | 8.929902e-07 | 8.191378e-33 | 6.891927e-16 | 2.915038e-27 | 1.540843e-12 |   |

90s  
2000s  
2010s  
2020s  
70s  
80s  
90s 1.000000e+00

#### Segment 4

|       | 2000s        | 2010s         | 2020s         | 70s          | \ |
|-------|--------------|---------------|---------------|--------------|---|
| 2000s | 1.000000e+00 |               |               |              |   |
| 2010s | 5.238532e-33 | 1.000000e+    |               |              |   |
| 2020s | 1.947804e-27 | 1.358642e-04  | 1.000000e+00  |              |   |
| 70s   | 4.516174e-67 | 2.343414e-156 | 8.764836e-105 | 1.000000e+00 |   |
| 80s   | 9.531076e-80 | 8.907845e-205 | 6.780215e-110 | 5.207507e-02 |   |
| 90s   | 5.989541e-27 | 9.914174e-114 | 7.129040e-67  | 1.532380e-18 |   |

|       | 80s          | 90s          |
|-------|--------------|--------------|
| 2000s |              |              |
| 2010s |              |              |
| 2020s |              |              |
| 70s   |              |              |
| 80s   | 1.000000e+00 |              |
| 90s   | 5.095302e-17 | 1.000000e+00 |

#### Segment 5

|       | 2000s        | 2010s         | 2020s        | 70s          | 80s          | \ |
|-------|--------------|---------------|--------------|--------------|--------------|---|
| 2000s | 1.000000e+00 |               |              |              |              |   |
| 2010s | 4.265413e-52 | 1.000000e+00  |              |              |              |   |
| 2020s | 6.325113e-40 | 1.953675e-05  | 1.000000e+00 |              |              |   |
| 70s   | 1.630212e-04 | 4.275951e-54  | 1.412056e-47 | 1.000000e+00 |              |   |
| 80s   | 1.451913e-39 | 2.747473e-170 | 1.495921e-98 | 2.695225e-11 | 1.000000e+00 |   |
| 90s   | 7.571017e-41 | 7.823486e-179 | 1.114864e-99 | 2.695225e-11 | 8.630063e-01 |   |

90s  
2000s  
2010s  
2020s  
70s  
80s  
90s 1.000000e+00

## Cognitive tension

A)

|                       | sum_sq       | df        | F            | p             |
|-----------------------|--------------|-----------|--------------|---------------|
| C(decades)            | 1.022364e+06 | 5.0       | 129.005819   | 3.857841e-137 |
| C(segment)            | 1.423752e+08 | 4.0       | 22456.818177 | 0.000000e+00  |
| C(decades):C(segment) | 1.218799e+07 | 20.0      | 384.481912   | 0.000000e+00  |
| Residual              | 6.207293e+09 | 3916300.0 | NaN          | NaN           |

B)

**Segment 1**

|       | 2000s         | 2010s        | 2020s         | 70s \         |
|-------|---------------|--------------|---------------|---------------|
| 2000s | 1.000000e+00  |              |               |               |
| 2010s | 1.116428e-03  | 1.000000e+00 |               |               |
| 2020s | 3.117660e-03  | 2.991516e-01 | 1.000000e+00  |               |
| 70s   | 4.108839e-306 | 0.000000e+00 | 2.801294e-179 | 1.000000e+00  |
| 80s   | 1.347150e-268 | 0.000000e+00 | 2.149272e-131 | 1.505562e-18  |
| 90s   | 1.319811e-23  | 7.761279e-41 | 2.928095e-19  | 3.124049e-188 |

|       | 80s           | 90s          |
|-------|---------------|--------------|
| 2000s |               |              |
| 2010s |               |              |
| 2020s |               |              |
| 70s   |               |              |
| 80s   | 1.000000e+00  |              |
| 90s   | 2.119548e-137 | 1.000000e+00 |

**Segment 2**

|       | 2000s        | 2010s         | 2020s        | 70s          | 80s \        |
|-------|--------------|---------------|--------------|--------------|--------------|
| 2000s | 1.000000e+00 |               |              |              |              |
| 2010s | 1.311948e-22 | 1.000000e+00  |              |              |              |
| 2020s | 1.633904e-26 | 8.855378e-07  | 1.000000e+00 |              |              |
| 70s   | 1.725682e-35 | 2.120988e-89  | 5.370646e-74 | 1.000000e+00 |              |
| 80s   | 2.957327e-52 | 1.578096e-134 | 2.122799e-87 | 9.018626e-01 | 1.000000e+00 |
| 90s   | 7.198552e-25 | 2.120988e-89  | 2.118690e-63 | 1.570824e-05 | 2.858753e-07 |

|       | 90s          |
|-------|--------------|
| 2000s |              |
| 2010s |              |
| 2020s |              |
| 70s   |              |
| 80s   |              |
| 90s   | 1.000000e+00 |

**Segment 3**

|       | 2000s        | 2010s        | 2020s        | 70s          | 80s \        |
|-------|--------------|--------------|--------------|--------------|--------------|
| 2000s | 1.000000e+00 |              |              |              |              |
| 2010s | 1.950014e-08 | 1.000000e+00 |              |              |              |
| 2020s | 2.297240e-15 | 3.682664e-06 | 1.000000e+00 |              |              |
| 70s   | 3.304732e-01 | 8.407044e-04 | 1.272789e-10 | 1.000000e+00 |              |
| 80s   | 1.483264e-01 | 1.063100e-04 | 6.395847e-12 | 8.365756e-01 | 1.000000e+00 |
| 90s   | 7.182002e-06 | 5.533885e-24 | 3.573902e-26 | 7.182002e-06 | 1.008853e-08 |

|       | 90s          |
|-------|--------------|
| 2000s |              |
| 2010s |              |
| 2020s |              |
| 70s   |              |
| 80s   |              |
| 90s   | 1.000000e+00 |

**Segment 4**

|       | 2000s         | 2010s         | 2020s         | 70s \        |
|-------|---------------|---------------|---------------|--------------|
| 2000s | 1.000000e+00  |               |               |              |
| 2010s | 1.919265e-11  | 1.000000e+    |               |              |
| 2020s | 1.426458e-13  | 5.060068e-04  | 1.000000e+00  |              |
| 70s   | 6.755987e-51  | 1.607794e-91  | 3.702360e-65  | 1.000000e+00 |
| 80s   | 9.325594e-119 | 8.970407e-196 | 1.743274e-102 | 2.595384e-04 |
| 90s   | 1.227359e-29  | 7.135711e-73  | 1.397690e-45  | 1.202163e-09 |

|       | 80s          | 90s          |
|-------|--------------|--------------|
| 2000s |              |              |
| 2010s |              |              |
| 2020s |              |              |
| 70s   |              |              |
| 80s   | 1.000000e+00 |              |
| 90s   | 1.665742e-33 | 1.000000e+00 |

**Segment 5**

|       | 2000s        | 2010s        | 2020s        | 70s          | 80s \        |
|-------|--------------|--------------|--------------|--------------|--------------|
| 2000s | 1.000000e+00 |              |              |              |              |
| 2010s | 6.033396e-03 | 1.000000e+00 |              |              |              |
| 2020s | 2.093036e-06 | 1.832742e-03 | 1.000000e+00 |              |              |
| 70s   | 1.514429e-11 | 2.167932e-06 | 7.084344e-01 | 1.000000e+00 |              |
| 80s   | 7.723703e-03 | 9.603821e-01 | 2.310199e-03 | 5.251277e-06 | 1.000000e+00 |
| 90s   | 9.776702e-03 | 1.712731e-07 | 4.467045e-10 | 2.772074e-18 | 5.314678e-07 |

|       | 90s |
|-------|-----|
| 2000s |     |
| 2010s |     |
| 2020s |     |
| 70s   |     |
| 80s   |     |
| 90s   |     |

2000s  
2010s  
2020s  
70s  
80s  
90s 1.000000e+00
